# Supplementary material for: Cerium End-Deposited Gold Nanorods-Based Photoimmunotherapy for Boosting Tumor Immunogenicity
Source: Pharmaceutics. 2023 Apr 21;15(4):1309. doi: 10.3390/pharmaceutics15041309 (PMC10145050; doi:10.3390/pharmaceutics15041309)
Supplement: Supplementary file 1 [file pharmaceutics-15-01309-s001.zip › pharmaceutics-2265834-supplementary.pdf]

## Supplementary materials

# Cerium End-deposited Gold Nanorods-based Photoimmunotherapy for Boosting Tumor Immunogenicity

Yanlin Feng <sup>1,†</sup>, Yumei Xu <sup>2,†</sup>, Zhaoyang Wen <sup>1</sup>, Xin Ning <sup>1</sup>, Jianlin Wang <sup>1</sup>, Deping Wang <sup>1,\*</sup>, Jimin Cao <sup>1</sup>, Xin Zhou <sup>1,2,\*</sup>

<sup>1</sup> Key Laboratory of Cellular Physiology, Ministry of Education, and the Department of Physiology, Shanxi Medical University, Taiyuan 030001, China

<sup>2</sup> Department of Medical Imaging, Shanxi Medical University, Taiyuan 030001, China

\* Correspondence: wangdeping@sxmu.edu.cn (D. Wang), xzhou@sxmu.edu.cn (X. Zhou)

# These authors contributed equally to this work.

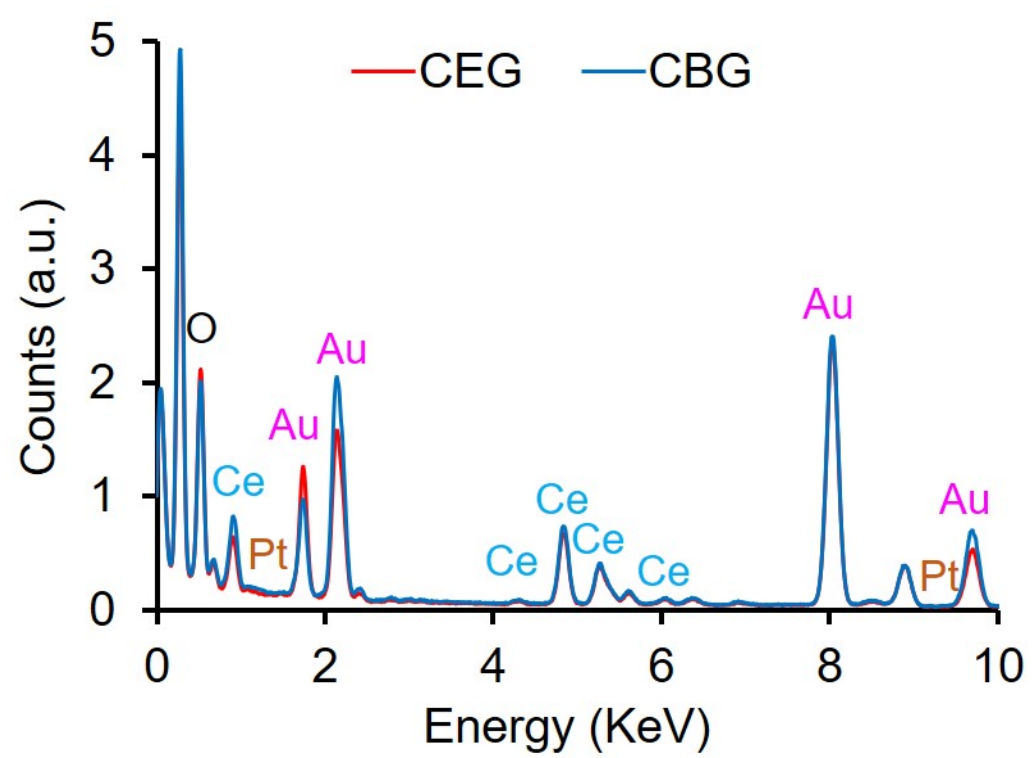

**Figure S1** EDX spectrum of CEG and CBG.

*The wt% and At % values of all elements in.*

| Element | wt%   | At%   |
|---------|-------|-------|
| O       | 21.27 | 74.22 |
| Ce      | 30.16 | 12.02 |
| Pt      | 2.04  | 0.58  |
| Au      | 46.53 | 13.19 |

| Element | wt%   | At%   |
|---------|-------|-------|
| O       | 25.43 | 78.17 |
| Ce      | 31.73 | 11.13 |
| Pt      | 2.78  | 0.70  |
| Au      | 40.06 | 10.00 |

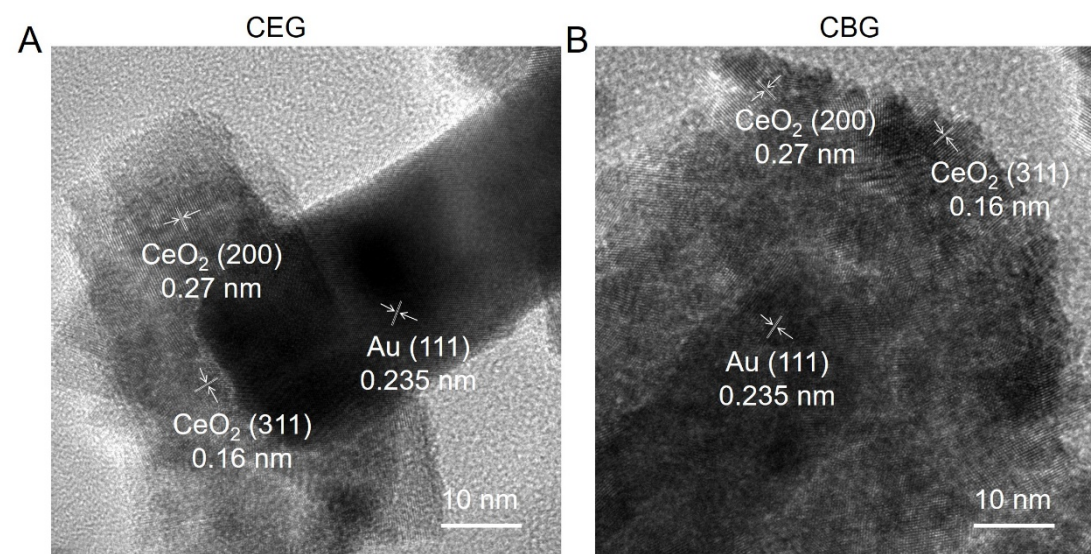

**Figure S2** HRTEM image of CEG and CBG.

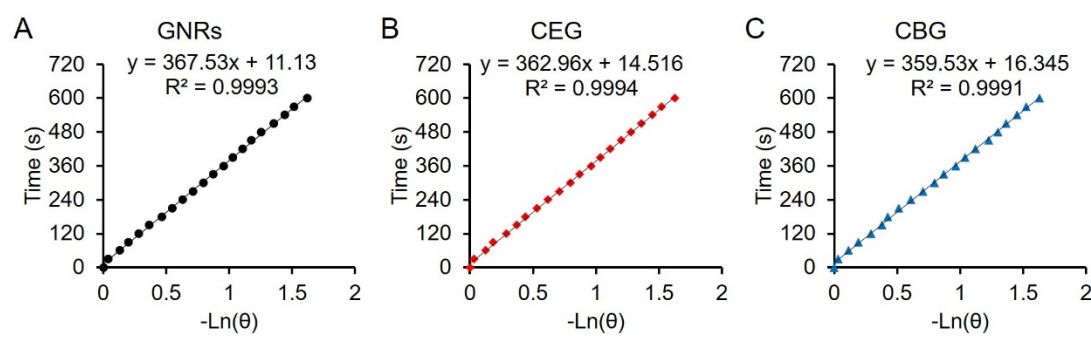

**Figure S3** Plot and linear fit of time versus negative natural logarithm of the temperature elevation for the cooling rate of GNRs, CEG and CBG.

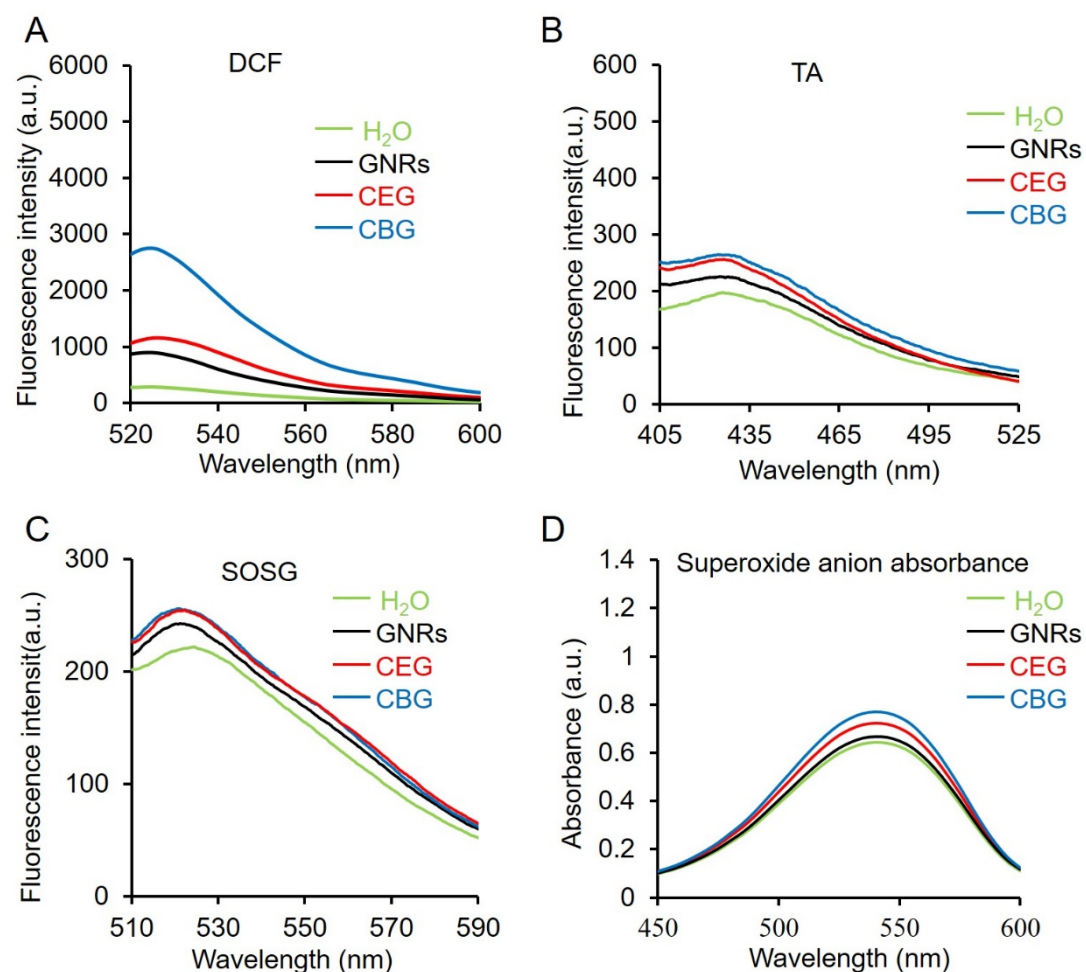

**Figure S4** Total ROS,  $\bullet\text{OH}$ ,  $^1\text{O}_2$  and  $\text{O}_2\bullet^-$  assessments on GNRs, CEG and CBG without NIR laser irradiation by DCF (a), TA (b), SOSG (c) and superoxide anion assay (d), respectively. PBS was used as control.

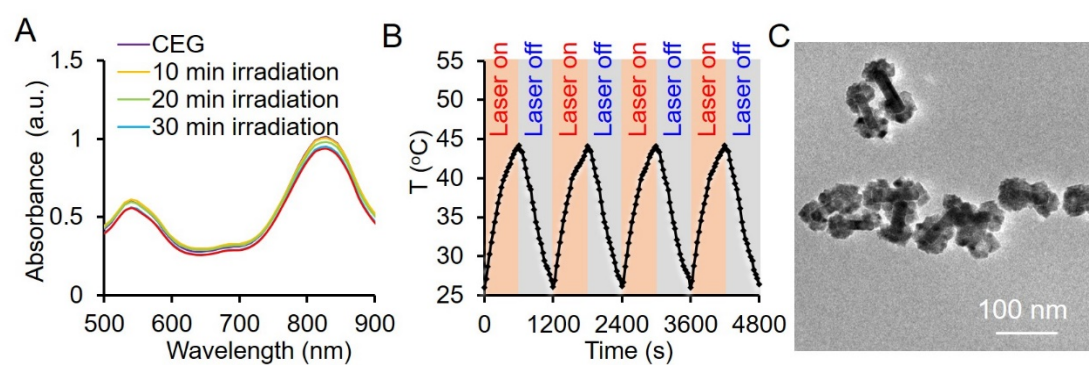

**Figure S5** Stability of CEG. (A) UV-Vis spectra of CEG before and after NIR irradiation. (B) The photothermal profiles of CEG (OD=1) over 4 irradiation cycles. (C) TEM image of CEG after 4 irradiation cycles.

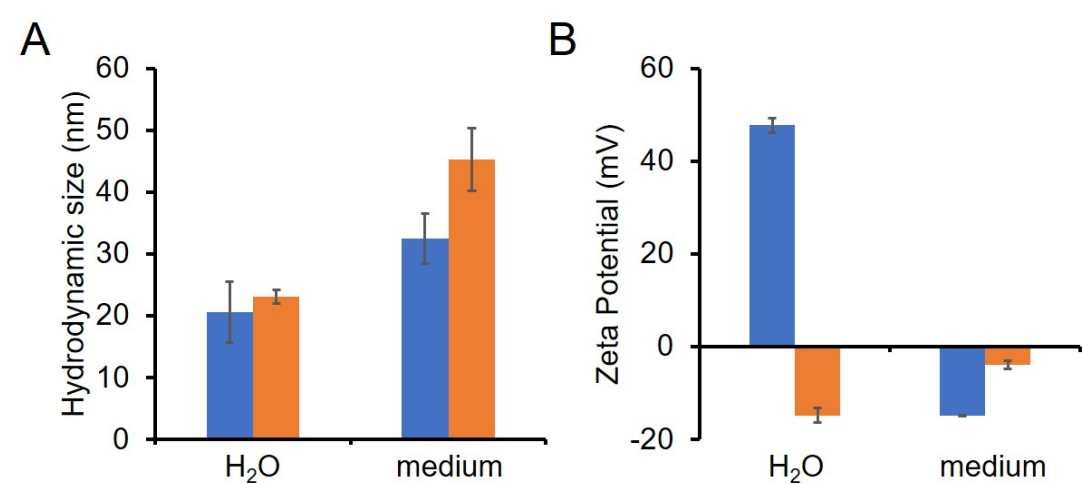

**Figure S6** (A) Hydrodynamic size and (B) Zeta potential of CEG NRs in H<sub>2</sub>O and cell culture medium before and after PEGylation.

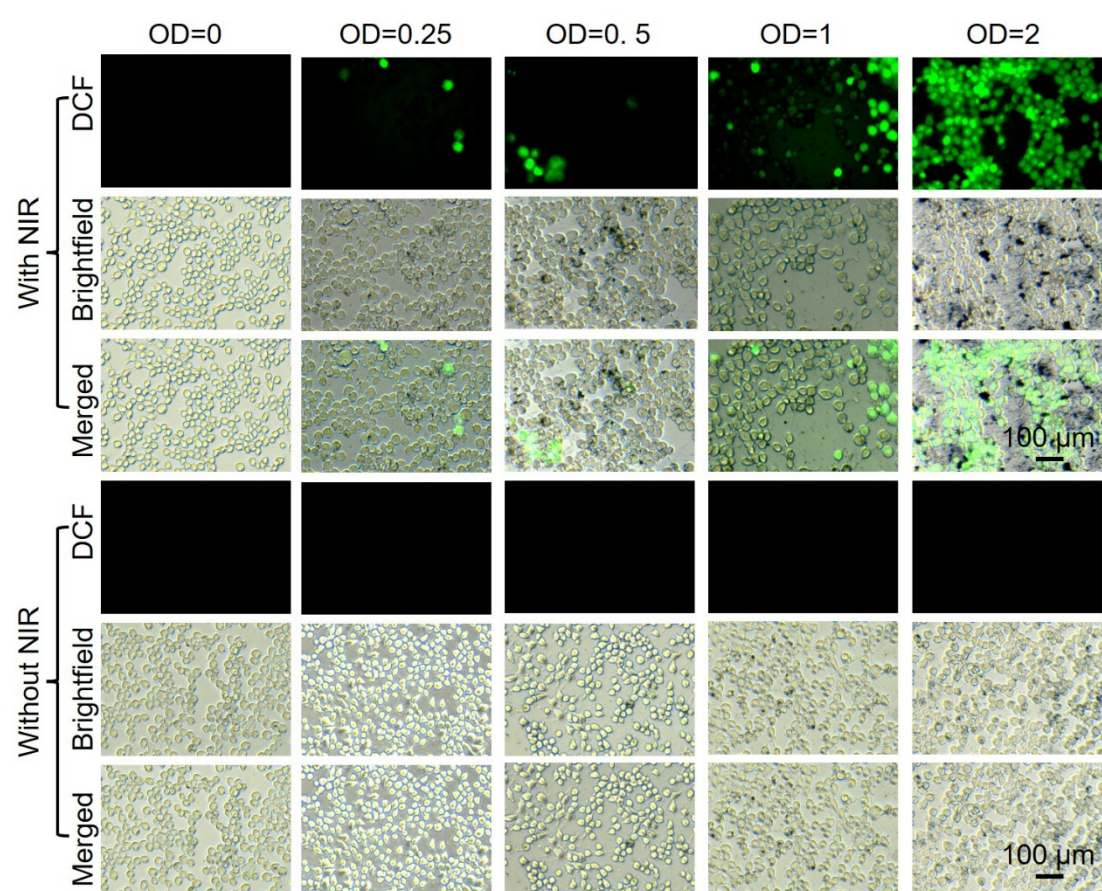

**Figure S7** Fluorescence microscopy images of 4T1 cells to detect intracellular ROS (DCF, green).

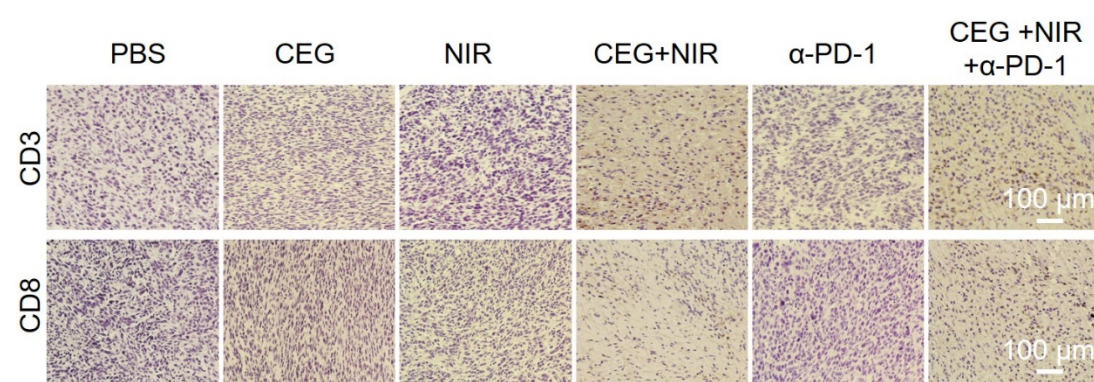

**Figure S8** Immunohistochemistry staining for CD8 and CD3 T cells in tumor tissues after various treatments indicated.

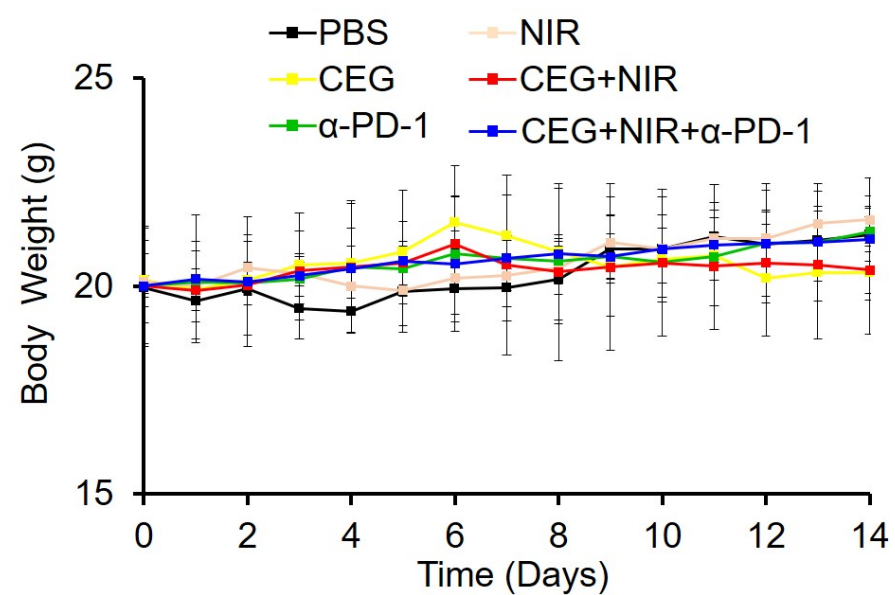

**Figure S9** Body weight of mice from different groups for 14 days after various treatments.

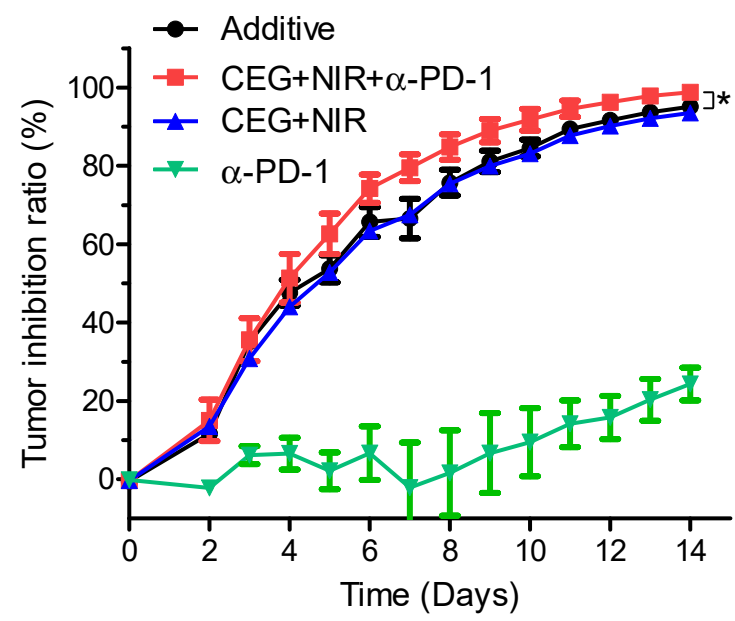

**Figure S10** Tumor inhibition ratio of the CEG+NIR+α-PD-1 group and additive tumor inhibition ratio of combination therapy of photoimmunotherapy and PD-1 blockade.

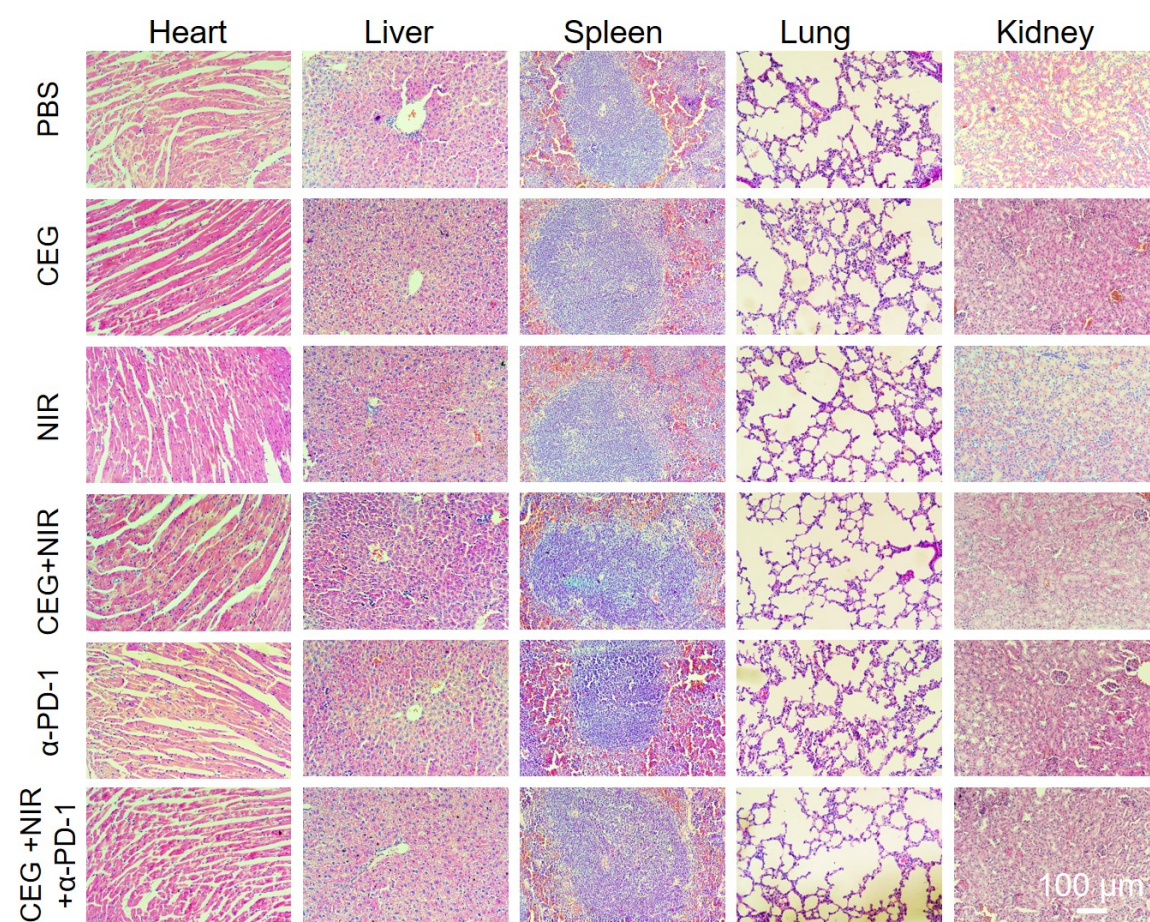

**Figure S11** H&E staining histological images of heart, liver, spleen, lung, and kidney collected at the end of treatment.
